# Supplementary material
Source: HighWire-hosted journal article supplement (https://bjsm.bmj.com/content/56/24/1422)
Supplement: inline-supplementary-material-1 [file inline-supplementary-material-1.pdf]

**Supplementary Appendix 1.** Complete search strategy, exemplified for MEDLINE Ovid.

The full search strategy is available on the Open Science Framework <https://osf.io/bkhr5/>.

## Field labels

- / After an index term indicates a subject heading were selected.  
 .tw. Indicates a search for a term in title or abstract  
 .kw. = keyword heading  
 .kf. = keyword heading word  
 \* At the end of a term indicates that this term has been truncated.  
 Adj3 Indicates a search for two terms next to each other, in any order, up to 3 words in between.

**MEDLINE (Ovid) ALL 1949 to May 05, 2022**

## Advanced search

Dates of search: 2020-06-16, 2021-07-07, and 2022-05-05

No search restrictions by publication or language.

| #  | Searches                                                                                                                                                                                        |
|----|-------------------------------------------------------------------------------------------------------------------------------------------------------------------------------------------------|
| 1  | Athletic Injuries/ or Rupture/ or "Sprains and Strains"/                                                                                                                                        |
| 2  | Anterior Cruciate Ligament/ or Menisci, Tibial/                                                                                                                                                 |
| 3  | 1 and 2                                                                                                                                                                                         |
| 4  | Anterior Cruciate Ligament Injuries/ or Tibial Meniscus Injuries/                                                                                                                               |
| 5  | 3 or 4                                                                                                                                                                                          |
| 6  | (menisc* adj3 (resect* or injur* or tear* or rupture* or repair* or reconstruct* or shav* or surg*).tw,kf.                                                                                      |
| 7  | ((ACL* or anterior cruciate ligament*) adj4 (injur* or tear* or sprain* or rupture* or reconstruct* or surg* or repair* or rupture*).tw,kf.                                                     |
| 8  | Meniscectomy/                                                                                                                                                                                   |
| 9  | exp Anterior Cruciate Ligament Reconstruction/                                                                                                                                                  |
| 10 | meniscectom*.tw,kf.                                                                                                                                                                             |
| 11 | or/6-10                                                                                                                                                                                         |
| 12 | Arthroscopy/                                                                                                                                                                                    |
| 13 | arthroscop*.tw,kf.                                                                                                                                                                              |
| 14 | or/12-13                                                                                                                                                                                        |
| 15 | (ACL* or anterior cruciate ligament* or menisc*).tw,kf.                                                                                                                                         |
| 16 | 2 or 15                                                                                                                                                                                         |
| 17 | 14 and 16                                                                                                                                                                                       |
| 18 | 5 or 11 or 17                                                                                                                                                                                   |
| 19 | Muscle strength/                                                                                                                                                                                |
| 20 | ((muscle* or lower extremity or quadriceps or knee or knees or lower limb or leg) adj3 (strength or force or weakness or power or performance or function or deficit or development)).tw,kw,kf. |
| 21 | or/19-20                                                                                                                                                                                        |
| 22 | (instrumentation or methods).fs.                                                                                                                                                                |
| 23 | (Validation Studies or Comparative Study).pt.                                                                                                                                                   |
| 24 | exp Psychometrics/                                                                                                                                                                              |
| 25 | psychometr*.ti,ab.                                                                                                                                                                              |
| 26 | (clinimetr* or clinometr*).tw.                                                                                                                                                                  |
| 27 | exp Outcome Assessment, Health Care/                                                                                                                                                            |
| 28 | outcome assessment.ti,ab.                                                                                                                                                                       |
| 29 | outcome measure*.tw.                                                                                                                                                                            |
| 30 | exp Observer Variation/                                                                                                                                                                         |
| 31 | observer variation.ti,ab.                                                                                                                                                                       |
| 32 | exp Health Status Indicators/                                                                                                                                                                   |
| 33 | exp Reproducibility of Results/                                                                                                                                                                 |
| 34 | reproducib*.ti,ab.                                                                                                                                                                              |
| 35 | exp Discriminant Analysis/                                                                                                                                                                      |
| 36 | (reliab* or unreliab* or valid* or coefficient or homogeneity or homogeneous or internal consistency).ti,ab.                                                                                    |
| 37 | (cronbach* adj3 (alpha or alphas)).ti,ab.                                                                                                                                                       |
| 38 | (item adj3 (correlation* or selection* or reduction*)).ti,ab.                                                                                                                                   |

- 39 (agreement or precision or imprecision or precise values or test-retest).ti,ab.  
40 (test adj3 retest).ti,ab.  
41 (reliab\* adj3 (test or retest)).ti,ab.  
42 (stability or interrater or inter-rater or intrarater or intra-rater or intertester or inter-tester or intratester or intra-tester or interobserver or inter-observer or intraobserver or intraobserver or intertechnician or inter-technician or intratechnician or intra-technician or interexaminer or inter-examiner or intraexaminer or intra-examiner or interassay or interassay or intraassay or intra-assay or interindividual or inter-individual or intraindividual or intra-individual or interparticipant or inter-participant or intraparticipant or intra-participant or kappa or kappas or repeatab\*).ti,ab.  
43 ((replicab\* or repeated) adj3 (measure or measures or findings or result or results or test or tests)).ti,ab.  
44 (generaliza\* or generalisa\* or concordance).ti,ab.  
45 (intraclass adj3 correlation\*).ti,ab.  
46 (discriminative or known group or factor analysis or factor analyses or dimension\* or subscale\*).ti,ab.  
47 (multitrait scaling adj3 (analysis or analyses)).ti,ab.  
48 (item discriminant or interscale correlation\* or error or errors or individual variability).ti,ab.  
49 (variability adj3 (analysis or values)).ti,ab.  
50 (uncertainty adj3 (measurement or measuring)).ti,ab.  
51 (standard error of measurement or sensitiv\* or responsive\*).ti,ab.  
52 (((minimal or minimally or clinical or clinically) adj3 (important or significant or detectable)) and (change or difference)).ti,ab.  
53 (small\* adj3 (real or detectable) adj3 (change or difference)).ti,ab.  
54 (meaningful change or ceiling effect or floor effect or Item response model or IRT or Rasch or Differential item functioning or DIF or computer adaptive testing or item bank or cross-cultural equivalence).ti,ab.  
55 or/22-54  
56 (addresses or biography or case reports or comment or directory or editorial or festschrift or interview or lectures or legal cases or legislation or letter or news or newspaper article or patient education handout or popular works or congresses or consensus development conference or consensus development conference, nih or practice guideline or randomized controlled trial or randomized controlled trial, veterinary or "systematic review").pt.  
57 ((veterinar\* or animal or animals or rabbit or rabbits or rodent or rodents or rat or rats or mouse or mice or hamster or hamsters or pig or pigs or piglet or piglets or porcine or pigeon\* or horse\* or equine or cow or cows or bovine or goat or goats or sheep or lamb or lambs or monkey or monkeys or murine or ovine or dog or dogs or canine or cat or cats or feline or dolphin\*) not (patient or patients or human or humans)).ti.  
58 (Animal Experimentation/ or exp Animals/ or exp Models, Animal/) not Humans/  
59 systematic review/ or exp randomized controlled trial/ or (systematic review or randomi?ed controlled trial).ti.  
60 or/56-59  
61 18 and 21 and 55  
62 61 not 60
-

**Supplementary Appendix 2.** A priori hypotheses used in data synthesis for construct validity

| <b>Strength tests</b>                                 | <b>Data management</b>                                                                                                       | <b>Hypotheses</b>                                                                                                                                                                     | <b>Interpretation</b>                                                                                                                                                                                               |
|-------------------------------------------------------|------------------------------------------------------------------------------------------------------------------------------|---------------------------------------------------------------------------------------------------------------------------------------------------------------------------------------|---------------------------------------------------------------------------------------------------------------------------------------------------------------------------------------------------------------------|
| Isokinetic concentric and isometric extensor strength | Qualitative synthesis: Weighted mean correlation coefficients (95% CI) between the strength test and comparator instruments. | Correlation $\geq 0.50$ with neural activity and hopping.<br>Correlation 0.30-0.50 with running, dynamic balance, and patient-reported outcomes (related, but dissimilar constructs). | Considered sufficient if correlation with hopping $\geq 0.50$ OR correlation with running, dynamic balance and patient-related outcomes 0.30-0.50 AND at least 75% of the results are in accordance with hypotheses |
| Isokinetic concentric and isometric flexor strength   | Qualitative synthesis: Weighted mean correlation coefficients (95% CI) between the strength test and comparator instruments. | Correlation $\geq 0.40$ with hopping.<br>Correlation 0.30-0.50 with running, dynamic balance, and patient-reported outcomes (related, but dissimilar constructs).                     | Considered sufficient if correlation with hopping $\geq 0.40$ OR correlation with running, dynamic balance and patient-related outcomes 0.30-0.50 AND at least 75% of the results are in accordance with hypotheses |
| Isokinetic eccentric and isotonic extensor strength   | Qualitative synthesis: Individual study results of correlation between the strength test and comparator instruments          | Correlation $\geq 0.50$ with hopping.<br>Correlation 0.30-0.50 with running, dynamic balance, and patient-reported outcomes (related, but dissimilar constructs).                     | Considered sufficient if at least 75% of the results are in accordance with hypotheses                                                                                                                              |
| Isokinetic eccentric flexor strength                  | Qualitative synthesis: Individual study results of correlation between the strength test and comparator instruments.         | Correlation $\geq 0.40$ with hopping.<br>Correlation 0.30-0.50 with running, dynamic balance, and patient-reported outcomes (related, but dissimilar constructs).                     | Considered sufficient if at least 75% of the results are in accordance with hypotheses                                                                                                                              |

### Supplementary Appendix 3. Excluded references and reason of exclusion based on full-text screening

#### References excluded for population

- 1 Andrade MS, Cohen M, Picarro IC, et al. Knee performance after anterior cruciate ligament reconstruction. *Isokinetics and Exercise Science* 2002;10:81-86
- 2 Bozic P, Suzovic D, Nedeljkovic A, et al. Alternating consecutive maximum contractions as a test of muscle function. *J Strength Cond Res* 2011;25:1605-15
- 3 Bozic PR, Pazin N, Berjan B, et al. Evaluation of alternating consecutive maximum contractions as an alternative test of neuromuscular function. *Eur J Appl Physiol* 2012;112:1445-56
- 4 Brasileiro JS, Pinto OMSF, ávila MA, et al. Functional and morphological changes in the quadriceps muscle induced by eccentric training after ACL reconstruction. *Alterações funcionais e morfológicas do quadríceps induzidas pelo treinamento excêntrico após reconstrução do LCA. Brazilian Journal of Physical Therapy / Revista Brasileira de Fisioterapia* 2011;15:284-90
- 5 Bryant AL, Pua YH and Clark RA. Morphology of knee extension torque-time curves following anterior cruciate ligament injury and reconstruction. *Journal of Bone & Joint Surgery - American Volume* 2009;91:1424-31
- 6 Casartelli NC, Item-Glatthorn JF, Friesenbichler B, et al. Quadriceps neuromuscular impairments after arthroscopic knee surgery: Comparison between procedures. *Journal of Clinical Medicine* 2019;8
- 7 de Vasconcelos RA, Bevilaqua-Grossi D, Shimano AC, et al. Reliability and Validity of a Modified Isometric Dynamometer in the Assessment of Muscular Performance in Individuals with Anterior Cruciate Ligament Reconstruction. *Revista Brasileira de Ortopedia* 2009;44:214-24
- 8 Dobija L, Reynaud V, Pereira B, et al. Measurement properties of the Star Excursion Balance Test in patients with ACL deficiency. *Physical Therapy in Sport* 2019;36:7-13
- 9 Iossifidou A, Baltzopoulos V and Giakas G. Isokinetic knee extension and vertical jumping: are they related? *J Sports Sci* 2005;23:1121-7
- 10 Kim DK, Geon P, Yu JH, et al. Relationship between knee extensor strength and dynamic balance ability using a flexible platform in partial anterior cruciate ligament injury. *Research Journal of Pharmacy and Technology* 2017;10:2285-88
- 11 Kollock R, Van Lunen BL, Ringleb SI, et al. Measures of functional performance and their association with hip and thigh strength. *J Athl Train* 2015;50:14-22
- 12 Kovalski JE, Heitman RJ, Andrew DPS, et al. Relationship Between Closed-Linear-Kinetic- and Open-Kinetic-Chain Isokinetic Strength and Lower Extremity Functional Performance. *Journal of Sport Rehabilitation* 2001;10:196-204
- 13 Lee DK, Kim GM, Ha SM, et al. Correlation of the Y-Balance Test with Lower-limb Strength of Adult Women. *J Phys Ther Sci* 2014;26:641-3
- 14 Maffiuletti NA, Barbero M, Cescon C, et al. Validity of the twitch interpolation technique for the assessment of quadriceps neuromuscular asymmetries. *Journal of Electromyography & Kinesiology* 2016;28:31-36
- 15 Neeter C, Gustavsson A, Thomee P, et al. Development of a strength test battery for evaluating leg muscle power after anterior cruciate ligament injury and reconstruction. *Knee Surgery, Sports Traumatology, Arthroscopy* 2006;14:571-80
- 16 Reichard LB, Croisier JL, Malnati M, et al. Testing knee extension and flexion strength at different ranges of motion: an isokinetic and electromyographic study. *Eur J Appl Physiol* 2005;95:371-6
- 17 Sinacore JA, Evans AM, Lynch BN, et al. Diagnostic Accuracy of Handheld Dynamometry and 1-Repetition-Maximum Tests for Identifying Meaningful Quadriceps Strength Asymmetries. *J Orthop Sports Phys Ther* 2017;47:97-107
- 18 Suzovic D, Nedeljkovic A, Pazin N, et al. Evaluation of Consecutive Maximum Contractions as a Test of Neuromuscular Function. *Journal of Human Kinetics - J HUM KINET* 2008;20:51-61

- 19 Tomioka M, Owings T and Grabiner MD. Lower Extremity Strength and Coordination Are Independent Contributors to Maximum Vertical Jump Height. *Journal of Applied Biomechanics* 2001;17:181-87

#### References excluded for strength measure

- 1 Batty LM, Feller JA, Hartwig T, et al. Single-Leg Squat Performance and Its Relationship to Extensor Mechanism Strength After Anterior Cruciate Ligament Reconstruction. *American Journal of Sports Medicine* 2019;47:3423-28
- 2 DiFabio M, Slater LV, Norte G, et al. Relationships of Functional Tests Following ACL Reconstruction: Exploratory Factor Analyses of the Lower Extremity Assessment Protocol. *Journal of Sport Rehabilitation* 2018;27:144-50
- 3 Ernst GP, Saliba E, Diduch DR, et al. Lower-extremity compensations following anterior cruciate ligament reconstruction. *Physical Therapy* 2000;80:251-60
- 4 Goradia VK, Grana WA and Pearson SE. Factors associated with decreased muscle strength after anterior cruciate ligament reconstruction with hamstring tendon grafts. *Arthroscopy* 2006;22:80
- 5 Lee HM, Cheng CK and Liao JJ. Correlation between proprioception, muscle strength, knee laxity, and dynamic standing balance in patients with chronic anterior cruciate ligament deficiency. *Knee* 2009;16:387-91
- 6 Lee DH, Lee JH, Jeong HJ, et al. Lack of Correlation between Dynamic Balance and Hamstring-to-Quadriceps Ratio in Patients with Chronic Anterior Cruciate Ligament Tears. *Knee Surgery & Related Research* 2015;27:101-07
- 7 O'Connor RF, King E, Richter C, et al. No Relationship Between Strength and Power Scores and Anterior Cruciate Ligament Return to Sport After Injury Scale 9 Months After Anterior Cruciate Ligament Reconstruction. *American Journal of Sports Medicine* 2020;48:78-84
- 8 Park WH, Kim DK, Yoo JC, et al. Correlation between dynamic postural stability and muscle strength, anterior instability, and knee scale in anterior cruciate ligament deficient knees. *Archives of Orthopaedic & Trauma Surgery* 2010;130:1013-18
- 9 Piussi R, Beischer S, Thomee R, et al. Hop tests and psychological PROs provide a demanding and clinician-friendly RTS assessment of patients after ACL reconstruction, a registry study. *BMC Sports Science, Medicine and Rehabilitation* 2020;12:32

#### References excluded for study type

- 1 Almosnino S, Brandon SC, Day AG, et al. Principal component modeling of isokinetic moment curves for discriminating between the injured and healthy knees of unilateral ACL deficient patients. *Journal of Electromyography & Kinesiology* 2014;24:134-43
- 2 Almosnino S, Dvir Z and Bardana DD. Consistency of strength curves for determining maximal effort production during isokinetic knee testing of anterior cruciate ligament-deficient patients. *Physiotherapy Theory & Practice* 2016;32:202-08
- 3 Anderson JL, Lamb SE, Barker KL, et al. Changes in muscle torque following anterior cruciate ligament reconstruction: a comparison between hamstrings and patella tendon graft procedures on 45 patients. *Acta Orthop Scand* 2002;73:546-52
- 4 Baumgart C, Welling W, Hoppe MW, et al. Angle-specific analysis of isokinetic quadriceps and hamstring torques and ratios in patients after ACL-reconstruction. *BMC Sports Science, Medicine & Rehabilitation* 2018;10:N.PAG-N.PAG
- 5 Bryant AL, Kelly J and Hohmann E. Neuromuscular adaptations and correlates of knee functionality following ACL reconstruction. *J Orthop Res* 2008;26:126-35
- 6 Bryant AL, Clark RA and Pua YH. Morphology of hamstring torque-time curves following ACL injury and reconstruction: mechanisms and implications. *J Orthop Res* 2011;29:907-14
- 7 Cervenka JJ, Decker MN, Ruhde LA, et al. Strength and Stability Analysis of Rehabilitated Anterior Cruciate Ligament Individuals. *International Journal of Exercise Science* 2018;11:817-26

- 8 Christensen JC, Goldfine LR, Barker T, et al. What can the first 2 months tell us about outcomes after anterior cruciate ligament reconstruction? *Journal of Athletic Training* 2015;50:508-15
- 9 Duckett T, Fox CM, Hart JM, et al. Rationale for a Parsimonious Measure of Subjective Knee Function Among Individuals With Anterior Cruciate Ligament Reconstruction: A Rasch Analysis. *Journal of athletic training* 2021;56:1340-48
- 10 Garcia SA, Moffit TJ, Vakula MN, et al. Quadriceps Muscle Size, Quality, and Strength and Self-Reported Function in Individuals With Anterior Cruciate Ligament Reconstruction. *Journal of athletic training* 2020;55:246-54
- 11 Garrison JC, Bothwell JM, Wolf G, et al. Y Balance Test Tm Anterior Reach Symmetry at Three Months Is Related to Single Leg Functional Performance at Time of Return to Sports Following Anterior Cruciate Ligament Reconstruction. *International Journal of Sports Physical Therapy* 2015;10:602-11
- 12 Hartigan EH, Lynch AD, Logerstedt DS, et al. Kinesiophobia after anterior cruciate ligament rupture and reconstruction: noncopers versus potential copers. *Journal of Orthopaedic & Sports Physical Therapy* 2013;43:821-32 doi:<https://dx.doi.org/10.2519/jospt.2013.4514>
- 13 Hetsroni I, Wiener Y, Ben-Sira D, et al. Symmetries in Muscle Torque and Landing Kinematics Are Associated With Maintenance of Sports Participation at 5 to 10 Years After ACL Reconstruction in Young Men. *Orthopaedic Journal of Sports Medicine* 2020;8:1-9
- 14 Holm I, Risberg MA, Aune AK, et al. Muscle strength recovery following anterior cruciate ligament reconstruction: a prospective study of 151 patients with a two-year follow-up. *Isokinetics & Exercise Science* 2000;8:57-63
- 15 Jarvela T, Kannus P, Latvala K, et al. Simple measurements in assessing muscle performance after an ACL reconstruction. *International Journal of Sports Medicine* 2002;23:196-201
- 16 Kadija M, Knezevic OM, Milovanovic D, et al. The effect of anterior cruciate ligament reconstruction on hamstring and quadriceps muscle function outcome ratios in male athletes. *Srpski Arhiv Za Celokupno Lekarstvo* 2016;144:151-57
- 17 Knezevic OM, Mirkov DM, Kadija M, et al. Evaluation of isokinetic and isometric strength measures for monitoring muscle function recovery after anterior cruciate ligament reconstruction. *Journal of Strength & Conditioning Research* 2014;28:1722-31
- 18 Konrath JM, Vertullo CJ, Kennedy BA, et al. Morphologic Characteristics and Strength of the Hamstring Muscles Remain Altered at 2 Years After Use of a Hamstring Tendon Graft in Anterior Cruciate Ligament Reconstruction. *American Journal of Sports Medicine* 2016;44:2589-98
- 19 Koutras G, Bernard M, Terzidis IP, et al. Comparison of knee flexion isokinetic deficits between seated and prone positions after ACL reconstruction with hamstrings graft: Implications for rehabilitation and return to sports decisions. *Journal of Science & Medicine in Sport* 2016;19:559-62
- 20 Lentz TA, Tillman SM, Indelicato PA, et al. Factors associated with function after anterior cruciate ligament reconstruction. *Sports Health* 2009;1:47-53
- 21 Lepley LK and Palmieri-Smith RM. Quadriceps Strength, Muscle Activation Failure, and Patient-Reported Function at the Time of Return to Activity in Patients Following Anterior Cruciate Ligament Reconstruction: A Cross-sectional Study. *Journal of Orthopaedic & Sports Physical Therapy* 2015;45:1017-25
- 22 McHugh MP, Tyler TF, Nicholas SJ, et al. Electromyographic analysis of quadriceps fatigue after anterior cruciate ligament reconstruction. *Journal of Orthopaedic & Sports Physical Therapy* 2001;31:25-32
- 23 Moisala AS, Jarvela T, Kannus P, et al. Muscle strength evaluations after ACL reconstruction. *International Journal of Sports Medicine* 2007;28:868-72
- 24 Norte GE, Hertel JN, Saliba SA, et al. Quadriceps and Patient-Reported Function in ACL-Reconstructed Patients: A Principal Component Analysis. *J Sport Rehabil* 2018:1-9
- 25 Oberlander KD, Bruggemann GP, Hoher J, et al. Altered landing mechanics in ACL-reconstructed patients. *Medicine & Science in Sports & Exercise* 2013;45:506-13

- 26 Santos HH, de Oliveira Sousa C, Medeiros CLP, et al. Correlation between Eccentric Training and Functional Tests in Subjects with Reconstructed Acl. *Correlación Entre Entrenamiento Excéntrico Y Pruebas Funcionales En Sujetos Con Lca Reconstruido*. *Revista Brasileira de Medicina do Esporte* 2018;24:471-76
- 27 Schmitt LC, Paterno MV and Hewett TE. The impact of quadriceps femoris strength asymmetry on functional performance at return to sport following anterior cruciate ligament reconstruction. *J Orthop Sports Phys Ther* 2012;42:750-9 doi:10.2519/jospt.2012.4194 [published Online First: 2012/07/21]
- 28 Skurvydas A, Masiulis N, Gudas R, et al. Extension and flexion torque variability in ACL deficiency. *Knee Surgery, Sports Traumatology, Arthroscopy* 2011;19:1307-13
- 29 Thomas AC, Wojtys EM, Brandon C, et al. Muscle atrophy contributes to quadriceps weakness after anterior cruciate ligament reconstruction. *J Sci Med Sport* 2016;19:7-11
- 30 Van Wyngaarden JJ, Jacobs C, Thompson K, et al. Quadriceps Strength and Kinesiophobia Predict Long-Term Function After ACL Reconstruction: A Cross-Sectional Pilot Study. *Sports health* 2021;13:251-57
- 31 Woodhouse LJ, Whittaker JL, Toomey CM, et al. Health-related Outcomes after a Youth Sport-related Knee Injury. *Medicine & Science in Sports & Exercise* 2019;51:255-63
- 32 Yoon T and Hwang J. Comparison of eccentric and concentric isokinetic exercise testing after anterior cruciate ligament reconstruction. *Yonsei Medical Journal* 2000;41:584-92
- 33 Woon E-L, Low J, Sng Y-L, et al. Feasibility, correlates, and validity of the one-leg sit-to-stand test in individuals following anterior cruciate ligament reconstruction. *Physical therapy in sport : official journal of the Association of Chartered Physiotherapists in Sports Medicine* 2021;52:280-86

#### References excluded for publication type

- 1 Flosadottir V, Roos EM and Ageberg E. Muscle function at 3 years following ACL injury is associated with 5-year patient-reported outcomes. *Osteoarthritis and Cartilage* 2016;24:S25-S26
- 2 Holsgaard-Larsen A, Jensen C and Aagaard P. Patient reported outcomes are associated with lowerlimb muscle strength and functional performance in ACL-patients-a cross-sectional study. *Osteoarthritis and Cartilage* 2014;22:S121-S22:
- 3 Kim JG, Kim SB, Chung KS, et al. Vertical jump test as a functional test after anterior cruciate ligament reconstruction. *Orthopaedic Journal of Sports Medicine*. Conference 2016;4
- 4 Harput G, Ulusoy B, Özer H, et al. Ön Çapraz BaĖ Cerrahisi Sonrasi Subjektif Ve Performans Temelli Sonuçlar Arasındaki İlişki. Associations between Self-Reported and Performance-Based Outcomes in Individuals Who Have Undergone Acl Reconstruction. *Journal of Exercise Therapy & Rehabilitation* 2017;4:S57-S57

#### References excluded for language

- 1 Baltaci G, Yilmaz G and Atay AO. The outcomes of anterior cruciate ligament reconstructed and rehabilitated knees versus healthy knees: a functional comparison. *Acta Orthopaedica et Traumatologica Turcica* 2012;46:186-95
- 2 Laboute E, Vignerot V, Puig PL, et al. 2D videographic analysis of knee function after anterior cruciate ligament repair: Vertical displacement and isokinetic strength. *Journal de Traumatologie du Sport* 2018;35:210-17
- 3 Xie D, Chen HF, Qi JH, et al. Validity of kinetic factors on evaluating the vertical jumping ability after anterior cruciate ligament reconstruction. *Chinese Journal of Tissue Engineering Research* 2016;20:7648-53

#### References excluded for publication year prior 2000

- 1 Borsa PA, Lephart SM and Irrgang JJ. Comparison of performance-based and patient reported measures of function in anterior-cruciate-ligament-deficient individuals. *Journal of Orthopaedic and Sports Physical Therapy* 1998;28:392-99
- 2 Petschnig R and Baron R. Assessment of quadriceps strength and functional limitations determined by hop tests for distance and a newly designed vertical jump test after anterior cruciate ligament reconstruction. *European Journal of Physical Medicine & Rehabilitation* 1997;7:81-86
- 3 Petschnig R, Baron R and Albrecht M. The relationship between isokinetic quadriceps strength test and hop tests for distance and one-legged vertical jump test following anterior cruciate ligament reconstruction. *Journal of Orthopaedic & Sports Physical Therapy* 1998;28:23-31
- 4 Seikiya I, Muneta T, Ogiuchi T, et al. Significance of the single-legged hop test to the anterior cruciate ligament-reconstructed knee in relation to muscle strength and anterior laxity. *American Journal of Sports Medicine* 1998;26:384-88
- 5 Stratford P. Reliability of a peak knee extensor and flexor torque protocol: A study of post ACL reconstructed knees. *Physiotherapy Canada* 1991;43:27-30
- 6 Wilk KE, Romaniello WT, Soscia SM, et al. The relationship between subjective knee scores, isokinetic testing, and functional testing in the ACL-reconstructed knee. *Journal of Orthopaedic & Sports Physical Therapy* 1994;20:60-73



**Supplementary Appendix 4.** Detailed description of the included strength tests

| Instrument               | References                      | Equipment                                        | Muscle group       | Position | Contraction mode                 | Range of motion (°) | Speed (°/s) | Duration (s) | Repetitions        | Variables reported |
|--------------------------|---------------------------------|--------------------------------------------------|--------------------|----------|----------------------------------|---------------------|-------------|--------------|--------------------|--------------------|
| Computerised dynamometry | 1-26                            | Biodex, Contrex, Cybex, IsoMed, Isosport, KinCom | Extensors, flexors | Seated   | Isokinetic concentric slow-speed | 90 to 0             | 60, 90, 120 | -            | 3, 4, 5, or 8      | PT, PT/BW, LSI     |
|                          | 3, 4, 11, 15, 17, 20, 22, 27-29 | Biodex, Cybex, IsoMed, Isosport, KinCom          | Extensors, flexors | Seated   | Isokinetic concentric high-speed | 90 to 0             | 180, 300    | -            | 3, 5, 8, 10, or 15 | PT, PT/BW, LSI     |
|                          | 10, 11, 15                      | Biodex, IsoMed2000                               | Extensors, flexors | Seated   | Isokinetic eccentric slow-speed  | 90 to 0             | 60, 90, 120 | -            | 3, 5               | PT/BW, LSI         |
|                          | 11, 15                          | Biodex                                           | Extensors, flexors | Seated   | Isokinetic eccentric high-speed  | 90 to 0             | 180         | -            | 5                  | PT/BW              |
|                          | 11, 14, 20, 30-32               | Biodex, Cybex                                    | Extensors          | Seated   | Isometric                        | At 30, 60, 90       | -           | 3, or ns     | 2, 3               | PT/BW, LSI         |
| Handheld dynamometry     | 17                              | KinCom                                           | Extensors, flexors | Seated   | Isometric (alternating)          | At 45               | -           | ns (to max)  | 5                  | PT                 |
|                          | 33-35                           | Hoggan Health, Lafayette                         | Extensors, flexors | Seated   | Isometric                        | At 60, 90           | -           | 5, or ns (to | 2, 3               | PT, PT/BW, LSI     |
|                          | 34                              | Hoggan Health                                    | Extensors          | Prone    | Isometric                        | At 90               | -           | 5            | 3                  | LSI                |
| Leg extension            | 35                              | Hoggan Health                                    | Flexors            | Prone    | Isometric                        | At 3                | -           | ns (to max)  | 3                  | PT                 |
|                          | 36                              | Cybex knee extension                             | Extensors          | Seated   | Isotonic                         | 90 to 40            | -           | -            | 1RM                | PT                 |
| Leg curl                 | 36                              | Cybex prone leg curl                             | Flexors            | Prone    | Isotonic                         | 90 to 0             | -           | -            | 1RM                | PT                 |
| Leg press                | 22                              | Keiser Air 300 Leg Press                         | Extensors          | Seated   | Isotonic                         | 100 to 0            | Max         | -            | 5 at 70% of 1RM    | Watt/BW            |

(BW) bodyweight; (LSI) limb symmetry index; (max) maximum; (ns) not specified; (PT) peak torque; (s) second; (1RM) one-repetition maximum; (°) degrees

**Supplementary Appendix 5.** Elements included in studies on reliability and measurement error.

**Almeida 2019**

| Elements                                                                                                                                                                                                           | Study 1 Isometric extensor strength test                                                                                                                                                                                                                                           |
|--------------------------------------------------------------------------------------------------------------------------------------------------------------------------------------------------------------------|------------------------------------------------------------------------------------------------------------------------------------------------------------------------------------------------------------------------------------------------------------------------------------|
| <b>1. Instrument</b>                                                                                                                                                                                               | Handheld dynamometer (HHD)                                                                                                                                                                                                                                                         |
| <b>2. Equipment, test protocol and variables reported</b>                                                                                                                                                          | <b>Equipment:</b> Lafayette Instrument Company HHD                                                                                                                                                                                                                                 |
|                                                                                                                                                                                                                    | <b>Test personnel:</b> Two raters. Five years of work experience. Blinded to the result.                                                                                                                                                                                           |
|                                                                                                                                                                                                                    | <b>Test procedures:</b> Two practice trials and 30-sec rest period before the test. Two test trials consisted of maximal isometric contractions for 5s. 1-min rest between legs. Verbal encouragement was given. The test was repeated if difference between the contractions >10% |
|                                                                                                                                                                                                                    | <b>Positioning procedures:</b> Seated position with 90° hip and knee flexion, and thigh and malleoli straps. Hands crossed over the trunk. HHD was positioned 2 cm proximal to the lateral malleolus midpoint.                                                                     |
|                                                                                                                                                                                                                    | <b>Variables reported:</b> Variables of both test trials were calculated as normalised peak torque multiplied by the lever arm.                                                                                                                                                    |
| <b>3. Construct</b>                                                                                                                                                                                                | Isometric extensor strength.                                                                                                                                                                                                                                                       |
| <b>4. Measurement property</b>                                                                                                                                                                                     | Reliability (rater n=2, intra-rater) and measurement error.                                                                                                                                                                                                                        |
| <b>5. Components that will be repeated</b>                                                                                                                                                                         | The measurement was repeated.                                                                                                                                                                                                                                                      |
| <b>6. Source of variation</b>                                                                                                                                                                                      | The measurement of two test trials.                                                                                                                                                                                                                                                |
| <b>7. Patient population</b>                                                                                                                                                                                       | ACL reconstruction (25 ± 3 mo. postop.), n=70 (9% females), without knee pain.                                                                                                                                                                                                     |
| <b>Comprehensive research question:</b> What is the intra-rater reliability (normalised peak torque) of isometric extensor strength test at 90° knee flexion based on two trials in ACL reconstructed individuals. |                                                                                                                                                                                                                                                                                    |

**Knezevic 2012**

| Elements                                                                                                                                                                                                                                    | Study 1 Isokinetic concentric slow-speed extensor and flexor strength test                                                                                                                                                                                                                                                                                            | Study 2 Isokinetic concentric high-speed extensor and flexor strength test                                                                                                                                                                                                                                                                                                                                                                                                                                        | Study 3 Alternating isometric extensor and flexor strength test |
|---------------------------------------------------------------------------------------------------------------------------------------------------------------------------------------------------------------------------------------------|-----------------------------------------------------------------------------------------------------------------------------------------------------------------------------------------------------------------------------------------------------------------------------------------------------------------------------------------------------------------------|-------------------------------------------------------------------------------------------------------------------------------------------------------------------------------------------------------------------------------------------------------------------------------------------------------------------------------------------------------------------------------------------------------------------------------------------------------------------------------------------------------------------|-----------------------------------------------------------------|
| <b>1. Instrument</b>                                                                                                                                                                                                                        | Computerised dynamometer                                                                                                                                                                                                                                                                                                                                              |                                                                                                                                                                                                                                                                                                                                                                                                                                                                                                                   |                                                                 |
| <b>2. Equipment, test protocol and variables reported</b>                                                                                                                                                                                   | <b>Equipment:</b> Kinetic Communication isokinetic dynamometer (KinCom)                                                                                                                                                                                                                                                                                               |                                                                                                                                                                                                                                                                                                                                                                                                                                                                                                                   |                                                                 |
|                                                                                                                                                                                                                                             | <b>Test personnel:</b> One rater. No information on work experience.                                                                                                                                                                                                                                                                                                  |                                                                                                                                                                                                                                                                                                                                                                                                                                                                                                                   |                                                                 |
|                                                                                                                                                                                                                                             | <b>Test procedures:</b> Warm-up consisted of 5 min of stationary cycling and passive stretching. Five submaximal practice trials. Test trials consisted of two series of five maximal repetitions at 60°/s and at 180°/s. 1-min rest between trails, 2-min rest between speeds. Verbal encouragement and real-time feedback were given. The uninvolved leg was first. | <b>Test procedures:</b> Warm-up and two isokinetic concentric strength tests preceded ( <i>cf.</i> Study 1 and 2). Five submaximal practice trials, followed by test trials, consisting of two series of five maximal alternating isometric contractions. Instructions given were “ <i>to consecutively exert the alternating maximum contractions of quadriceps and hamstrings as strong and as quickly as possible</i> ”. Verbal encouragement and real-time feedback were given. The uninvolved leg was first. |                                                                 |
|                                                                                                                                                                                                                                             | <b>Positioning procedures:</b> Seated position. Pelvis, thigh, and malleoli straps. Tightly holding the sides of the dynamometer chair. The axis of rotation of the dynamometer was aligned with the axis of the knee. Range of motion was limited from 90° to 10° of knee flexion.                                                                                   | <b>Positioning procedures:</b> Seated position. Pelvis, thigh, and malleoli straps. Tightly holding the sides of the dynamometer chair. The axis of rotation of the dynamometer was aligned with the axis of the knee. Knee flexion angle was fixed at 45°.                                                                                                                                                                                                                                                       |                                                                 |
| <b>Variables reported:</b> The trial with the highest peak torque was used for data analysis, and calculated as mean peak torque multiplied by the lever arm.                                                                               |                                                                                                                                                                                                                                                                                                                                                                       |                                                                                                                                                                                                                                                                                                                                                                                                                                                                                                                   |                                                                 |
| <b>3. Construct</b>                                                                                                                                                                                                                         | Isokinetic concentric slow-speed extensor and flexor strength.                                                                                                                                                                                                                                                                                                        | Isokinetic concentric high-speed extensor and flexor strength.                                                                                                                                                                                                                                                                                                                                                                                                                                                    | Isometric extensor and flexor strength.                         |
| <b>4. Measurement property</b>                                                                                                                                                                                                              | Intra-rater reliability (rater n=1) and measurement error.                                                                                                                                                                                                                                                                                                            |                                                                                                                                                                                                                                                                                                                                                                                                                                                                                                                   |                                                                 |
| <b>5. Components that will be repeated</b>                                                                                                                                                                                                  | The entire test procedure was repeated.                                                                                                                                                                                                                                                                                                                               |                                                                                                                                                                                                                                                                                                                                                                                                                                                                                                                   |                                                                 |
| <b>6. Source of variation</b>                                                                                                                                                                                                               | Occasion (time interval of 48 hours).                                                                                                                                                                                                                                                                                                                                 |                                                                                                                                                                                                                                                                                                                                                                                                                                                                                                                   |                                                                 |
| <b>7. Patient population</b>                                                                                                                                                                                                                | ACL reconstruction (4 mo. postop.), n=15 (0% females). No knee pain was reported prior or during the tests.                                                                                                                                                                                                                                                           |                                                                                                                                                                                                                                                                                                                                                                                                                                                                                                                   |                                                                 |
| <b>Comprehensive research question:</b> What is the intra-rater reliability (peak torque) of isokinetic concentric extensor and flexor strength test at 60°/s and 180°/s based on the mean of five trials in ACL reconstructed individuals. |                                                                                                                                                                                                                                                                                                                                                                       |                                                                                                                                                                                                                                                                                                                                                                                                                                                                                                                   |                                                                 |

**Ross 2002**

| Elements                                                                                                                                                                                                                     | Study 1 Isokinetic concentric slow-speed extensor strength test                                                                                                                                                                                                                                       |
|------------------------------------------------------------------------------------------------------------------------------------------------------------------------------------------------------------------------------|-------------------------------------------------------------------------------------------------------------------------------------------------------------------------------------------------------------------------------------------------------------------------------------------------------|
| <b>1. Instrument</b>                                                                                                                                                                                                         | Computerised dynamometer                                                                                                                                                                                                                                                                              |
| <b>2. Equipment, test protocol and variables reported</b>                                                                                                                                                                    | <b>Equipment:</b> Kinetic Communication isokinetic dynamometer (KinCom)                                                                                                                                                                                                                               |
|                                                                                                                                                                                                                              | <b>Test personnel:</b> One rater. No information on the rater's work experience.                                                                                                                                                                                                                      |
|                                                                                                                                                                                                                              | <b>Test procedures:</b> Warm-up consisted of 5 min of self-paced stationary cycling, followed by quadriceps, hamstring, and calf muscle stretching three times 30-s. Three submaximal practice trials and 1-min rest period before five test trials at 60°/s. The uninjured leg was first.            |
|                                                                                                                                                                                                                              | <b>Positioning procedures:</b> Seated position, with waist and thigh straps. The tibial pad was placed 2.5 cm proximal to the lateral malleolus. The axis of rotation of the dynamometer was aligned with the lateral femoral epicondyle. Range of motion was limited from 90° to 0° of knee flexion. |
|                                                                                                                                                                                                                              | <b>Variables reported:</b> Limb symmetry index was calculated using the mean peak torque.                                                                                                                                                                                                             |
| <b>3. Construct</b>                                                                                                                                                                                                          | Isokinetic concentric slow-speed extensor strength.                                                                                                                                                                                                                                                   |
| <b>4. Measurement property</b>                                                                                                                                                                                               | Reliability (rater n=1, intra-rater) and measurement error.                                                                                                                                                                                                                                           |
| <b>5. Components that will be repeated</b>                                                                                                                                                                                   | The entire test procedure was repeated.                                                                                                                                                                                                                                                               |
| <b>6. Source of variation</b>                                                                                                                                                                                                | Occasion (time interval of 5 days).                                                                                                                                                                                                                                                                   |
| <b>7. Patient population</b>                                                                                                                                                                                                 | ACL reconstruction (27 ± 13 mo. postop.), n=10 (30% females). The knee condition had reached a plateau and remained unchanged between tests.                                                                                                                                                          |
| <b>Comprehensive research question:</b> What is the intra-rater reliability (leg symmetry index) of isokinetic concentric extensor strength test at 60°/s based on the mean of five trials in ACL reconstructed individuals. |                                                                                                                                                                                                                                                                                                       |

**Wongcharoenwatana 2019**

| Elements                                                                                                                                                                                                                           | Study 1 Isometric extensor strength test (seated)                                                                                                                                                                                              | Study 2 Isometric extensor strength test prone                                                                                                                                             |
|------------------------------------------------------------------------------------------------------------------------------------------------------------------------------------------------------------------------------------|------------------------------------------------------------------------------------------------------------------------------------------------------------------------------------------------------------------------------------------------|--------------------------------------------------------------------------------------------------------------------------------------------------------------------------------------------|
| <b>1. Instrument</b>                                                                                                                                                                                                               | Handheld dynamometer (HHD)                                                                                                                                                                                                                     |                                                                                                                                                                                            |
| <b>2. Equipment, test protocol and variables reported</b>                                                                                                                                                                          | <b>Equipment:</b> Hoggan Health Industries HHD                                                                                                                                                                                                 |                                                                                                                                                                                            |
|                                                                                                                                                                                                                                    | <b>Test personnel:</b> Two raters. One female and male athletic trainers with HHD training. Blinded to the result.                                                                                                                             |                                                                                                                                                                                            |
|                                                                                                                                                                                                                                    | <b>Test procedures:</b> A maximal isokinetic strength test was performed first, followed by 10-min rest. Three submaximal practice trials and three maximal test trials consisting of isometric contractions for 5s. 10-min rest between legs. |                                                                                                                                                                                            |
|                                                                                                                                                                                                                                    | <b>Positioning procedures:</b> Seated position. Trunk, waist, and thigh straps. 90° hip and knee flexion. HHD device on the anterior aspect of the tibia 3 cm above the lateral malleolus.                                                     | <b>Positioning procedures:</b> Prone position, fixed with thigh straps. No hip flexion, 90° knee flexion. HHD device on the anterior aspect of the tibia 3 cm above the lateral malleolus. |
|                                                                                                                                                                                                                                    | <b>Variables reported:</b> Mean limb symmetry index.                                                                                                                                                                                           |                                                                                                                                                                                            |
| <b>3. Construct</b>                                                                                                                                                                                                                | Isometric extensor strength.                                                                                                                                                                                                                   | Isometric extensor strength, prone.                                                                                                                                                        |
| <b>4. Measurement property</b>                                                                                                                                                                                                     | Intra-rater and inter-rater reliability (rater n=2).                                                                                                                                                                                           |                                                                                                                                                                                            |
| <b>5. Components that will be repeated</b>                                                                                                                                                                                         | Intra-rater reliability: The measurement was repeated.                                                                                                                                                                                         |                                                                                                                                                                                            |
|                                                                                                                                                                                                                                    | Intra-rater reliability: The entire test was repeated.                                                                                                                                                                                         |                                                                                                                                                                                            |
| <b>6. Source of variation</b>                                                                                                                                                                                                      | Intra-rater reliability: The measurement of three test trials.                                                                                                                                                                                 |                                                                                                                                                                                            |
|                                                                                                                                                                                                                                    | Inter-rater reliability: The entire test was repeated.                                                                                                                                                                                         |                                                                                                                                                                                            |
| <b>7. Patient population</b>                                                                                                                                                                                                       | ACL reconstruction (10 [3-70] mo. postop.), n=60 (12% females), without knee pain.                                                                                                                                                             |                                                                                                                                                                                            |
| <b>Comprehensive research question:</b> What is the intra-rater reliability and inter-rater reliability (leg symmetry index) of isometric extensor test at 90° based on the mean of three trials in ACL reconstructed individuals. |                                                                                                                                                                                                                                                |                                                                                                                                                                                            |

**Supplementary Appendix 6.** Forest plots for meta-analyses on qualitatively pooled correlation coefficients between strength tests and categorised comparator instruments

Isokinetic concentric slow-speed extensor strength test

Comparator instrument: Hop tests

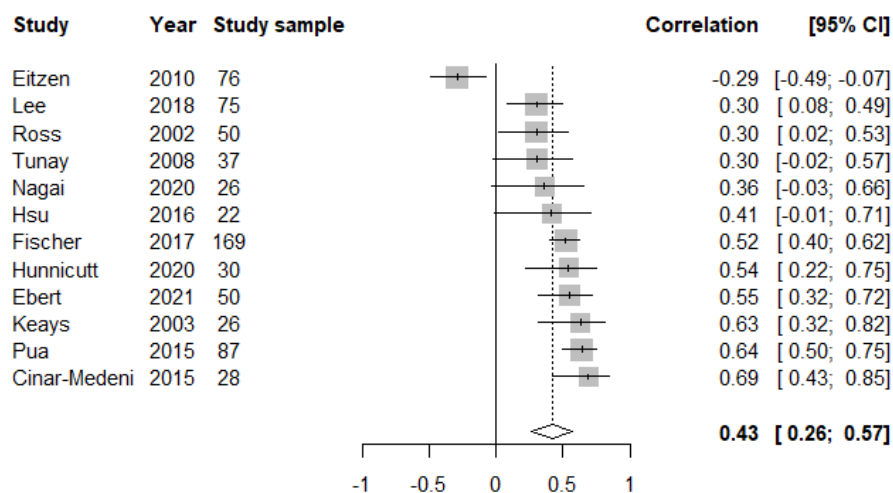

Comparator instrument: Running tests

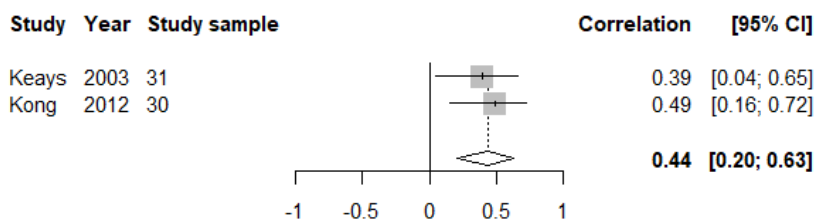

Comparator instrument: Balance tests

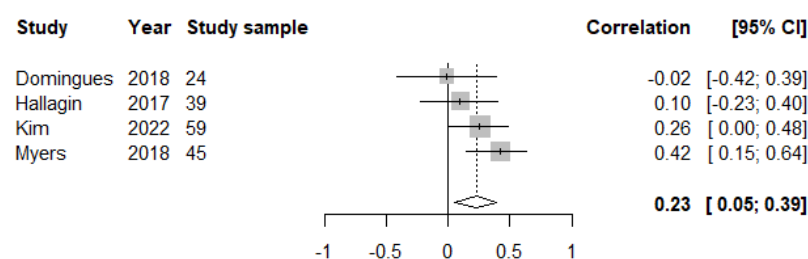

Comparator instrument: PROMS

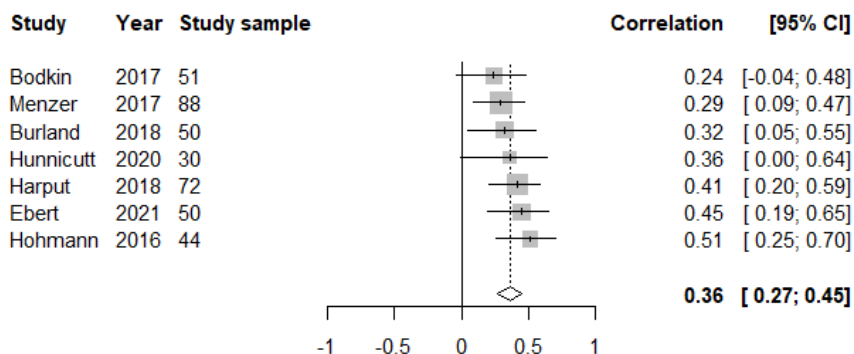

Isokinetic concentric high-speed extensor strength test

Comparator instrument: Hop tests

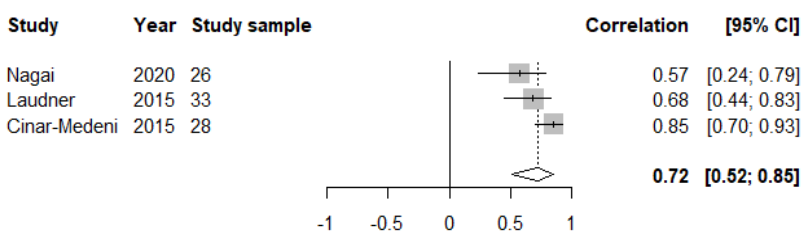

Comparator instrument: PROMS

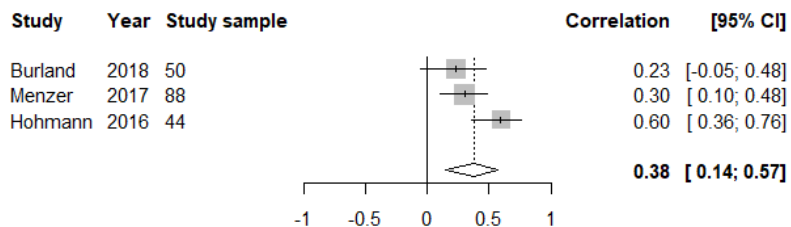

Isokinetic concentric slow-speed flexor strength test

Comparator instrument: Hop tests

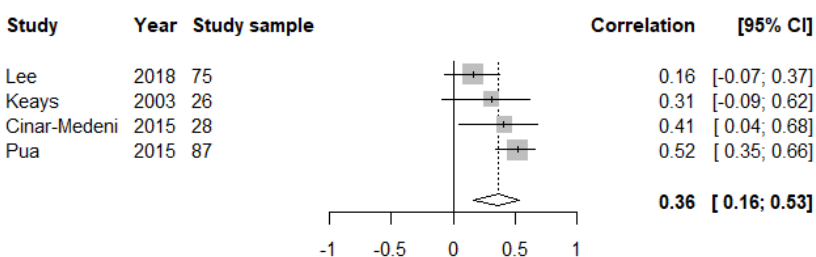

## Comparator instrument: Running tests

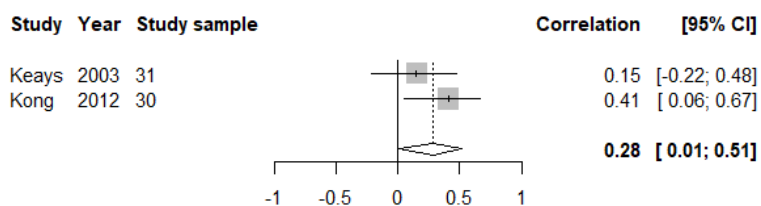

## Comparator instrument: Balance tests

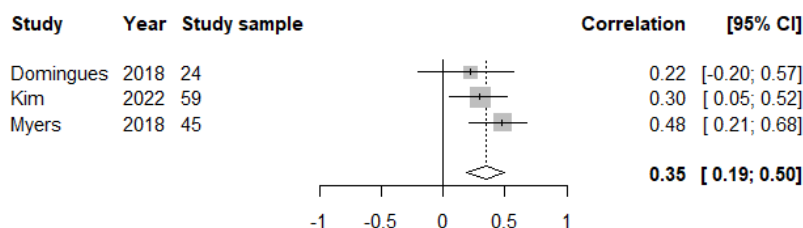

## Comparator instrument: PROMS

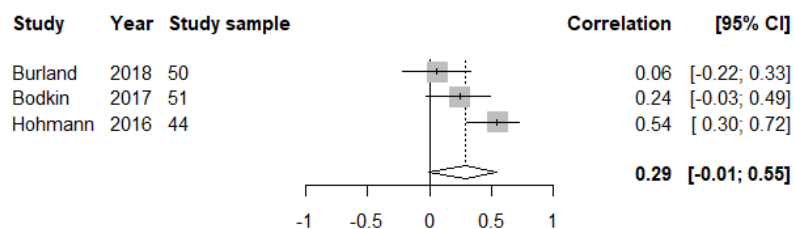Isokinetic concentric high-speed flexor strength test

## Comparator instrument: Hop tests

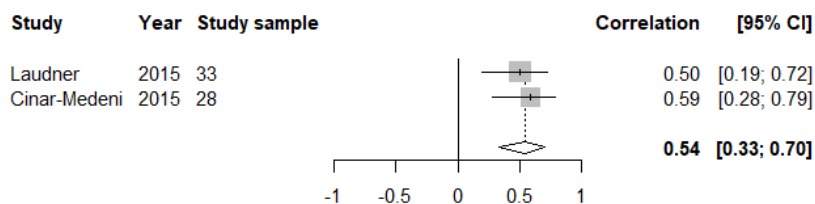

## Comparator instrument: PROMS

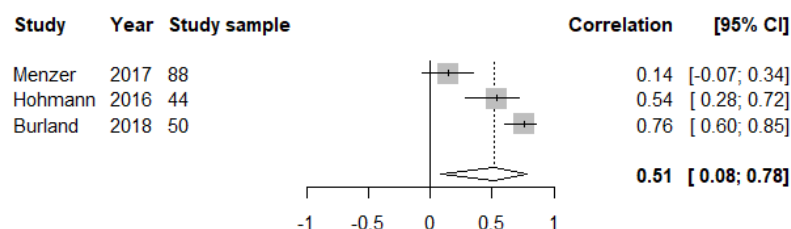



Isometric extensor strength test

Comparator instrument: Hop tests

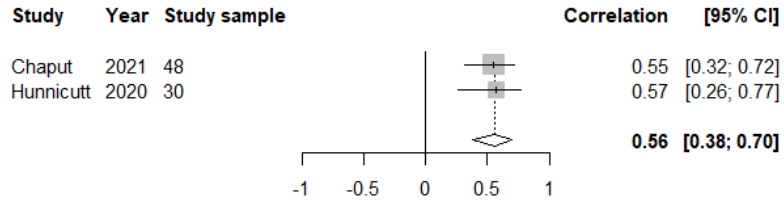

Comparator instrument: PROMS

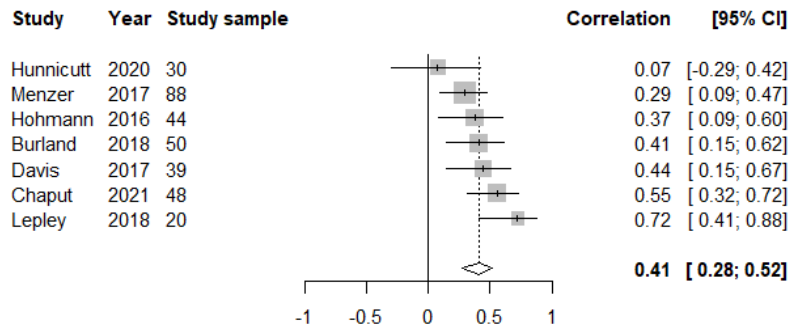

Isometric flexor strength test

Comparator instrument: PROMS

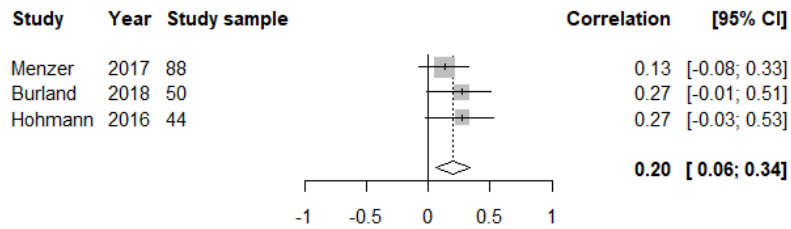

### Supplementary Appendix 7. COSMIN methodological quality ratings and correlation coefficients for studies included in the meta-analyses on construct validity

| Strength tests                                     | Study             | n         | COSMIN score | Neural activity | Hop tests | Running tests | Balance tests | PROMS* |
|----------------------------------------------------|-------------------|-----------|--------------|-----------------|-----------|---------------|---------------|--------|
| Isokinetic concentric slow-speed extensor strength | Bodkin 2017       | 51        | Very good    | -               | -         | -             | -             | 0.24   |
|                                                    | Bodkin 2019       | 29        | Inadequate   | -0.50           | -         | -             | -             | -      |
|                                                    | Burland 2018      | 50        | Very good    | -               | -         | -             | -             | 0.32   |
|                                                    | Cinar-Medeni 2015 | 28        | Very good    | -               | 0.69      | -             | -             | -      |
|                                                    | Domingues 2018    | 24        | Adequate     | -               | -         | -             | -0.02         | -      |
|                                                    | Ebert 2021        | 50        | Very good    | -               | 0.57      | 0.34          | -             | 0.51   |
|                                                    | Eitzen 2010       | 76        | Very good    | -               | -0.29     | -             | -             | -      |
|                                                    | Fischer 2017      | 169       | Very good    | -               | 0.52      | -             | -             | -      |
|                                                    | Hallagin 2017     | 39        | Very good    | -               | -         | -             | 0.10          | -      |
|                                                    | Harput 2018       | 72        | Doubtful     | -               | -         | -             | -             | 0.41   |
|                                                    | Hohmann 2016      | 44        | Very good    | -               | -         | -             | -             | 0.51   |
|                                                    | Hsieh 2015        | 28        | Very good    | -               | -         | -             | -             | ns     |
|                                                    | Hsu 2016          | 22        | Very good    | -               | 0.41      | -             | -             | -      |
|                                                    | Hunnicutt 2020    | 30        | Very good    | -               | 0.54      | -             | -             | 0.36   |
|                                                    | Jamshidi 2005     | 11        | Doubtful     | -               | ns        | -             | -             | -      |
|                                                    | Keays 2003        | 26        | Very good    | -               | 0.63      | -             | -             | -      |
|                                                    |                   | 31        | Very good    | -               | -         | 0.39          | -             | -      |
|                                                    | Kim 2022          | 59        | Adequate     | -               | -         | -             | 0.03          | -      |
|                                                    | Kong 2012         | 30        | Adequate     | -               | -         | 0.49          | -             | -      |
|                                                    | Lee 2018          | 75        | Adequate     | -               | 0.30      | -             | -             | -      |
| Menzer 2017                                        | 88                | Very good | -            | -               | -         | -             | 0.29          |        |
| Myers 2018                                         | 45                | Adequate  | -            | -               | -         | 0.42          | -             |        |
| Nagai 2020                                         | 26                | Very good | -            | 0.36            | -         | -             | -             |        |
| Pua 2015                                           | 87                | Very good | -            | 0.64            | -         | -             | -             |        |
| Ross 2002                                          | 50                | Very good | -            | 0.30            | -         | -             | -             |        |
| Tunay 2008                                         | 37                | Very good | -            | 0.30            | -         | -             | -             |        |
| Isokinetic concentric high-speed extensor strength | Burland 2018      | 50        | Very good    | -               | -         | -             | -             | 0.23   |
|                                                    | Cinar-Medeni 2015 | 28        | Very good    | -               | 0.85      | -             | -             | -      |
|                                                    | Clagg 2015        | 66        | Doubtful     | -               | -         | -             | ns            | -      |
|                                                    | Hohmann 2016      | 44        | Very good    | -               | -         | -             | -             | 0.60   |
|                                                    | Jamshidi 2005     | 11        | Doubtful     | -               | ns        | -             | -             | -      |
|                                                    | Laudner 2015      | 33        | Very good    | -               | 0.68      | -             | -             | -      |
|                                                    | Menzer 2017       | 88        | Very good    | -               | -         | -             | -             | 0.30   |
|                                                    | Nagai 2020        | 26        | Very good    | -               | 0.57      | -             | -             | -      |
|                                                    | Sueyoshi 2017     | 29        | Very good    | -               | ns        | -             | -             | -      |
|                                                    | Bodkin 2017       | 51        | Very good    | -               | -         | -             | -             | 0.25   |
| Isokinetic concentric slow-speed flexor strength   | Burland 2018      | 50        | Very good    | -               | -         | -             | -             | 0.06   |
|                                                    | Cinar-Medeni 2015 | 28        | Very good    | -               | 0.41      | -             | -             | -      |
|                                                    | Domingues 2018    | 24        | Adequate     | -               | -         | -             | 0.22          | -      |
|                                                    | Hohmann 2016      | 44        | Very good    | -               | -         | -             | -             | 0.55   |
|                                                    | Jamshidi 2005     | 11        | Doubtful     | -               | ns        | -             | -             | -      |
|                                                    | Keays 2003        | 26        | Very good    | -               | 0.31      | -             | -             | -      |
|                                                    |                   | 31        | Very good    | -               | -         | 0.15          | -             | -      |
|                                                    | Kong 2012         | 30        | Adequate     | -               | -         | 0.41          | -             | -      |
|                                                    | Lee 2018          | 75        | Adequate     | -               | 0.16      | -             | -             | -      |
|                                                    | Myers 2018        | 45        | Adequate     | -               | -         | -             | 0.48          | -      |
| Pua 2015                                           | 87                | Very good | -            | 0.52            | -         | -             | -             |        |
| Isokinetic concentric high-speed flexor strength   | Burland 2018      | 50        | Very good    | -               | -         | -             | -             | 0.08   |
|                                                    | Cinar-Medeni 2015 | 28        | Very good    | -               | 0.59      | -             | -             | -      |
|                                                    | Clagg 2015        | 66        | Doubtful     | -               | -         | -             | ns            | -      |
|                                                    | Hohmann 2016      | 44        | Very good    | -               | -         | -             | -             | 0.54   |
|                                                    | Jamshidi 2005     | 11        | Doubtful     | -               | ns        | -             | -             | -      |
|                                                    | Laudner 2015      | 33        | Very good    | -               | 0.50      | -             | -             | -      |
|                                                    | Menzer 2017       | 88        | Very good    | -               | -         | -             | -             | 0.14   |
|                                                    | Sueyoshi 2017     | 29        | Very good    | -               | ns        | -             | -             | -      |
| Burland 2018                                       | 50                | Very good | -            | -               | -         | -             | 0.41          |        |

|                                   |               |    |           |   |      |   |   |      |
|-----------------------------------|---------------|----|-----------|---|------|---|---|------|
| Isometric<br>extensor<br>strength | Chaput 2021   | 48 | Very good | - | 0.55 | - | - | 0.55 |
|                                   | Davis 2017    | 39 | Very good | - | -    | - | - | 0.44 |
|                                   | Hohmann 2016  | 44 | Very good | - | -    | - | - | 0.37 |
|                                   | Hunnicut 2020 | 30 | Very good | - | 0.57 | - | - | 0.08 |
|                                   | Lepley 2018   | 20 | Very good | - | -    | - | - | 0.72 |
| Isometric<br>flexor<br>strength   | Menzer 2017   | 88 | Very good | - | -    | - | - | 0.29 |
|                                   | Burland 2018  | 50 | Very good | - | -    | - | - | 0.27 |
|                                   | Hohmann 2016  | 44 | Very good | - | -    | - | - | 0.27 |
|                                   | Menzer 2017   | 88 | Very good | - | -    | - | - | 0.13 |

(n) sample size; (ns) not specified; (slow-speed) 60 to 120 degrees/second; (high-speed) 180 to 300 degrees/second;  
 Negative associations due to time-based variables (running tests) were removed for consistent presentation of the results.  
 \*Included PROMS (patient-related outcome measures) were Knee Documentation Committee Subjective Knee Form, Knee injury and Osteoarthritis Outcome Score sport and recreation and knee-related quality of life subscales, and Cincinnati Knee Rating System

**Supplementary Appendix 8.** COSMIN methodological quality ratings and correlation coefficients for studies included in the qualitative syntheses on construct validity

| Strength test                                     | Instrument | Study         | n   | COSMIN score | Hop tests | PROMS* | Results (rating) |
|---------------------------------------------------|------------|---------------|-----|--------------|-----------|--------|------------------|
| Isokinetic eccentric slow-speed extensor strength | Com. dyn.  | Harput 2018   | 72  | Doubtful     | -         | ns     | 1+               |
|                                                   | Com. dyn.  | Hohmann 2016  | 44  | Very good    | -         | 0.43   |                  |
|                                                   | Com. dyn.  | Jamshidi 2005 | 11  | Doubtful     | ns        | -      |                  |
| Isokinetic eccentric high-speed extensor strength | Com. dyn.  | Hohmann 2016  | 44  | Very good    | -         | 0.43   | 1+               |
|                                                   | Com. dyn.  | Jamshidi 2005 | 11  | Doubtful     | ns        | -      |                  |
| Isokinetic eccentric slow-speed flexor strength   | Com. dyn.  | Harput 2018   | 72  | Doubtful     | -         | 0.46   | 2+               |
|                                                   | Com. dyn.  | Hohmann 2016  | 44  | Very good    | -         | 0.32   |                  |
|                                                   | Com. dyn.  | Jamshidi 2005 | 11  | Doubtful     | ns        | -      |                  |
| Isokinetic eccentric high-speed flexor strength   | Com. dyn.  | Hohmann 2016  | 44  | Very good    | -         | 0.40   | 1+               |
|                                                   | Com. dyn.  | Jamshidi 2005 | 11  | Doubtful     | ns        | -      |                  |
| Isotonic extensor strength                        | Leg press  | Nagai 2020    | 26  | Very good    | 0.34      | -      | 1-               |
| Isometric extensor strength                       | HHD        | Manchado 2021 | 194 | Very good    | -         | 0.20   | 1-               |
| Isometric flexor strength, prone                  | HHD        | Manchado 2021 | 194 | Very good    | -         | 0.18   | 1-               |

(com. dyn.) computerised dynamometry; (HHD) handheld dynamometry; (n) sample size; (ns) not specified; (slow-speed) 60 to 120 degrees/second; (high-speed) 180 to 300 degrees/second

\*Included PROMS (patient-related outcome measures) were Knee Documentation Committee Subjective Knee Form, Knee injury and Osteoarthritis Outcome Score sport and recreation and knee-related quality of life subscales, and Cincinnati Knee Rating System

### Supplementary Appendix 9. COSMIN methodological quality ratings and correlation coefficient for studies on criterion validity

| Strength tests                                     | Instruments              | Variables reported | Study                  | n   | COSMIN score | Summary result (rating) |
|----------------------------------------------------|--------------------------|--------------------|------------------------|-----|--------------|-------------------------|
| Isokinetic concentric high-speed extensor strength | Computerized dynamometry | PT/BW              | Nagai 2020             | 26  | Very good    | $r=0.82-0.83$ (+)       |
| Isometric extensor strength                        | HHD                      | PT/BW              | Almeida 2019           | 70  | Very good    | $r=0.62$ (-)            |
|                                                    | HHD                      | LSI                | Wongcharoenwatana 2019 | 60  | Very good    | $r=0.36-0.52$ (-)       |
| Isometric extensor strength, prone                 | HHD                      | LSI                | Wongcharoenwatana 2019 | 60  | Very good    | $r=0.17-0.36$ (-)       |
| Isotonic extensor strength                         | Leg extension            | PT                 | Pua 2017               | 106 | Very good    | $r=0.91$ (+)            |
|                                                    | Leg press                | PT/BW              | Nagai 2020             | 26  | Very good    | $r=0.57$ (-)            |
| Isotonic flexor strength, prone                    | Leg curl                 | PT                 | Pua 2017               | 106 | Very good    | $r=0.80$ (+)            |

(BW) body weight; (HHD) handheld dynamometry; (LSI) limb symmetry index; (n) sample size; (PT) peak torque; ( $r$ ) correlation coefficient; (high-speed) 180 to 300 degrees/second

## Appendix 10. Modified GRADE table

| Strength tests                                     | Studies, number | Individuals, number | Graded factor (level of downgrading)   | Quality of evidence |
|----------------------------------------------------|-----------------|---------------------|----------------------------------------|---------------------|
| <b>Reliability</b>                                 |                 |                     |                                        |                     |
| <i>Intra-rater</i>                                 |                 |                     |                                        |                     |
| Isokinetic concentric 60°/s extensor strength      | 2               | 25                  | Inconsistency (one); imprecision (two) | Very low            |
| Isokinetic concentric 180°/s extensor strength     | 1               | 15                  | Risk of bias (one); imprecision (two)  | Very low            |
| Isokinetic concentric 60°/s flexor strength        | 1               | 15                  | Risk of bias (one); imprecision (two)  | Very low            |
| Isokinetic concentric 180°/s flexor strength       | 1               | 15                  | Risk of bias (one); imprecision (two)  | Very low            |
| Isometric extensor strength                        | 2               | 130                 | Inconsistency (one)                    | Moderate            |
| Isometric extensor strength, prone                 | 1               | 60                  | Risk of bias (two); imprecision (one)  | Very low            |
| Alternating isometric extensor strength            | 1               | 15                  | Risk of bias (two); imprecision (one)  | Very low            |
| Alternating isometric flexor strength              | 1               | 15                  | Risk of bias (two); imprecision (one)  | Very low            |
| <i>Inter-rater</i>                                 |                 |                     |                                        |                     |
| Isometric extensor strength                        | 1               | 60                  | Risk of bias (two); imprecision (one)  | Very low            |
| Isometric extensor strength, prone                 | 1               | 60                  | Risk of bias (two) imprecision (one)   | Very low            |
| <b>Measurement error</b>                           |                 |                     |                                        |                     |
| Isokinetic concentric 60°/s extensor strength      | 2               | 25                  | -                                      | -                   |
| Isokinetic concentric 180°/s extensor strength     | 1               | 15                  | -                                      | -                   |
| Isokinetic concentric 60°/s flexor strength        | 1               | 15                  | -                                      | -                   |
| Isokinetic concentric 180°/s flexor strength       | 1               | 15                  | -                                      | -                   |
| Isometric extensor strength                        | 1               | 130                 | -                                      | -                   |
| Alternating isometric extensor strength            | 1               | 15                  | -                                      | -                   |
| Alternating isometric extensor strength            | 1               | 15                  | -                                      | -                   |
| <b>Construct validity</b>                          |                 |                     |                                        |                     |
| Isokinetic concentric slow-speed extensor strength | 26              | 1277                | Inconsistency (one)                    | Moderate            |
| Isokinetic concentric high-speed extensor strength | 9               | 375                 | Inconsistency (one)                    | Moderate            |
| Isokinetic concentric slow-speed flexor strength   | 12              | 502                 | Inconsistency (one)                    | Moderate            |
| Isokinetic concentric high-speed flexor strength   | 8               | 349                 | Inconsistency (one)                    | Moderate            |
| Isokinetic eccentric slow-speed extensor strength  | 1               | 44                  | Imprecision (two)                      | Low                 |
| Isokinetic eccentric high-speed extensor strength  | 1               | 44                  | Imprecision (two)                      | Low                 |
| Isokinetic eccentric slow-speed flexor strength    | 2               | 116                 | -                                      | High                |
| Isokinetic eccentric high-speed flexor strength    | 1               | 44                  | Imprecision (two)                      | Low                 |
| Isometric extensor strength                        | 7               | 319                 | Inconsistency (one)                    | Moderate            |
| Isometric flexor strength                          | 3               | 182                 | Inconsistency (one)                    | Moderate            |
| Isometric extensor strength (HHD)                  | 1               | 194                 | -                                      | High                |
| Isometric flexor strength, prone (HHD)             | 1               | 194                 | -                                      | High                |
| Isotonic extensor strength (leg press)             | 1               | 26                  | Imprecision (two)                      | Low                 |
| <b>Criterion validity</b>                          |                 |                     |                                        |                     |
| Isokinetic concentric high-speed extensor strength | 1               | 26                  | Imprecision (two)                      | Low                 |
| Isometric extensor strength (HHD)                  | 2               | 130                 | -                                      | High                |
| Isometric extensor strength, prone (HHD)           | 1               | 60                  | Imprecision (one)                      | Moderate            |
| Isotonic extensor strength (leg extension)         | 1               | 106                 | -                                      | High                |
| Isotonic extensor strength (leg press)             | 1               | 26                  | Imprecision (two)                      | Low                 |
| Isotonic flexor strength, prone (leg curl)         | 1               | 106                 | -                                      | High                |

(HHD) handheld dynamometry; (slow-speed) 60 to 120 degrees/second; (high-speed) 180 to 300 degrees/second

Unless otherwise stated, strength tests were performed using computerised dynamometry

Four factors (risk of bias, inconsistency, imprecision, and indirectness) were evaluated for grading quality of evidence: starting point at high quality; downgraded for risk of bias by one level if there is one study of adequate quality available, two levels if there is one study of doubtful quality available; downgraded for inconsistency by one level if serious; downgraded for imprecision by one level if total sample size = 50-100, two levels if total sample size <50

## Appendix 11. Summary of Findings

| Strength tests (variable)                               | Instrument    | Summary or pooled result                         | Overall rating | Quality of evidence |
|---------------------------------------------------------|---------------|--------------------------------------------------|----------------|---------------------|
| <b>Reliability</b>                                      |               |                                                  |                |                     |
| <i>Intra-rater</i>                                      |               |                                                  |                |                     |
| Isokinetic concentric 60°/s extensor strength (LSI, PT) | Com. dyn.     | ICC: 0.95; n: 25                                 | Sufficient     | Very low            |
| Isokinetic concentric 180°/s extensor strength (PT)     | Com. dyn.     | ICC: 0.99; n: 15                                 | Sufficient     | Very low            |
| Isokinetic concentric 60°/s flexor strength (PT)        | Com. dyn.     | ICC: 0.99; n: 15                                 | Sufficient     | Very low            |
| Isokinetic concentric 180°/s flexor strength (PT)       | Com. dyn.     | ICC: 0.99; n: 15                                 | Sufficient     | Very low            |
| Isometric extensor strength (PT/BW, LSI)                | Com. dyn.     | ICC: 0.91-98; n: 130                             | Sufficient     | Moderate            |
| Isometric extensor strength prone (LSI)                 | Com. dyn.     | ICC: 0.90; n: 60                                 | Sufficient     | Very low            |
| Alternating isometric extensor strength (LSI)           | Com. dyn.     | ICC: 0.95; n: 60                                 | Sufficient     | Very low            |
| Alternating isometric flexor strength (LSI)             | Com. dyn.     | ICC: 0.89; n: 60                                 | Sufficient     | Very low            |
| <i>Inter-rater</i>                                      |               |                                                  |                |                     |
| Isometric extensor strength (LSI)                       | Com. dyn.     | ICC: 0.60; n: 60                                 | Insufficient   | Very low            |
| Isometric extensor prone strength (LSI)                 | Com. dyn.     | ICC: 0.43; n: 60                                 | Insufficient   | Very low            |
| <b>Measurement error</b>                                |               |                                                  |                |                     |
| Isokinetic concentric 60°/s extensor strength (PT, LSI) | Com. dyn.     | SEM: 3.8; CV 8.3%; n: 25                         | Indeterminate  | -                   |
| Isokinetic concentric 180°/s extensor strength (PT)     | Com. dyn.     | CV: 2.9%; n: 15                                  | Indeterminate  | -                   |
| Isokinetic concentric 60°/s flexor strength (PT)        | Com. dyn.     | CV: 3.4%; n: 15                                  | Indeterminate  | -                   |
| Isokinetic concentric 180°/s flexor strength (PT)       | Com. dyn.     | CV: 3.3%; n: 15                                  | Indeterminate  | -                   |
| Isometric extensor strength (PT/BW)                     | Com. dyn.     | SEM: 0.6%; SDC 95%: 1.7%; LOA: -18.7,17.9; n: 70 | Indeterminate  | -                   |
| Alternating isometric extensor strength (PT)            | Com. dyn.     | CV: 9.2%; n: 60                                  | Indeterminate  | -                   |
| Alternating isometric extensor strength (PT)            | Com. dyn.     | CV: 10.3%; n: 60                                 | Indeterminate  | -                   |
| <b>Construct validity</b>                               |               |                                                  |                |                     |
| Isokinetic concentric slow-speed extensor strength      | Com. dyn.     | 3 of 5 hypotheses confirmed                      | Sufficient     | Moderate            |
| Isokinetic concentric high-speed extensor strength      | Com. dyn.     | 2 of 2 hypotheses confirmed                      | Sufficient     | Moderate            |
| Isokinetic concentric slow-speed flexor strength        | Com. dyn.     | 1 of 4 hypotheses confirmed                      | Insufficient   | Moderate            |
| Isokinetic concentric high-speed flexor strength        | Com. dyn.     | 2 of 2 hypotheses confirmed                      | Sufficient     | Moderate            |
| Isokinetic eccentric slow-speed extensor strength       | Com. dyn.     | 1 of 1 hypotheses confirmed                      | Sufficient     | Low                 |
| Isokinetic eccentric high-speed extensor strength       | Com. dyn.     | 1 of 1 hypotheses confirmed                      | Sufficient     | Low                 |
| Isokinetic eccentric slow-speed flexor strength         | Com. dyn.     | 2 of 2 hypotheses confirmed                      | Sufficient     | High                |
| Isokinetic eccentric high-speed flexor strength         | Com. dyn.     | 1 of 1 hypotheses confirmed                      | Sufficient     | Low                 |
| Isometric extensor strength                             | Com. dyn.     | 2 of 2 hypotheses confirmed                      | Sufficient     | Moderate            |
| Isometric flexor strength                               | Com. dyn.     | 0 of 1 hypotheses confirmed                      | Insufficient   | Moderate            |
| Isometric extensor strength                             | HHD           | 0 of 1 hypotheses confirmed                      | Insufficient   | High                |
| Isometric flexor strength, prone                        | HHD           | 0 of 1 hypotheses confirmed                      | Insufficient   | High                |
| Isotonic extensor strength                              | Leg press     | 0 of 1 hypotheses confirmed                      | Insufficient   | Low                 |
| <b>Criterion validity</b>                               |               |                                                  |                |                     |
| Isokinetic concentric high-speed extensor strength      | Com. dyn.     | 2 of 2 hypotheses confirmed                      | Sufficient     | Low                 |
| Isometric extensor strength                             | HHD           | 0 of 1 hypotheses confirmed                      | Insufficient   | High                |
| Isometric extensor strength, prone                      | HHD           | 0 of 2 hypotheses confirmed                      | Insufficient   | Moderate            |
| Isotonic extensor strength                              | Leg extension | 1 of 1 hypotheses confirmed                      | Sufficient     | High                |
| Isotonic extensor strength                              | Leg press     | 0 of 1 hypotheses confirmed                      | Insufficient   | Low                 |
| Isotonic flexor strength, prone                         | Leg curl      | 1 of 1 hypotheses confirmed                      | Sufficient     | High                |

(BW) body weight; (com. dyn.) computerised dynamometry; (CV) coefficient of variation; (HHD) handheld dynamometry; (ICC) intraclass correlation coefficient; (LOA) limits of agreement; (LSI) limb symmetry index; (n) sample size; (PT) peak torque; (SDC) smallest detectable change; (SEM) standard error of measurement; (°/s) degrees/second; (slow-speed) 60 to 120 degrees/second; (high-speed) 180 to 300 degrees/second

## References

- 1 Bodkin S, Goetschius J, Hertel J, et al. Relationships of Muscle Function and Subjective Knee Function in Patients After ACL Reconstruction. *Orthop J Sports Med* 2017;5:2325967117719041 doi:10.1177/2325967117719041 [published Online First: 2017/08/15]
- 2 Bodkin SG, Norte GE and Hart JM. Corticospinal excitability can discriminate quadriceps strength indicative of knee function after ACL-reconstruction. *Scand J Med Sci Sports* 2019;29:716-24 doi:10.1111/sms.13394 [published Online First: 2019/01/24]
- 3 Burland JP, Kostyun RO, Kostyun KJ, et al. Clinical Outcome Measures and Return-to-Sport Timing in Adolescent Athletes After Anterior Cruciate Ligament Reconstruction. *J Athl Train* 2018;53:442-51 doi:10.4085/1062-6050-302-16 [published Online First: 2018/05/31]
- 4 Cinar-Medeni O, Baltaci G, Bayramlar K, et al. Core stability, knee muscle strength, and anterior translation are correlated with postural stability in anterior cruciate ligament-reconstructed patients. *Am J Phys Med Rehabil* 2015;94:280-7 doi:10.1097/PHM.000000000000177 [published Online First: 2014/08/15]
- 5 Domingues PC, Serenza FS, Muniz TB, et al. The relationship between performance on the modified star excursion balance test and the knee muscle strength before and after anterior cruciate ligament reconstruction. *Knee* 2018;25:588-94 doi:10.1016/j.knee.2018.05.010 [published Online First: 2018/06/11]
- 6 Ebert JR, Edwards P, Preez LD, et al. Knee extensor strength, hop performance, patient-reported outcome and inter-test correlation in patients 9-12 months after anterior cruciate ligament reconstruction. *Knee* 2021;30:176-84 doi:10.1016/j.knee.2021.04.012 [published Online First: 2021/05/04]
- 7 Eitzen I, Eitzen TJ, Holm I, et al. Anterior Cruciate Ligament-Deficient Potential Copers and Noncopers Reveal Different Isokinetic Quadriceps Strength Profiles in the Early Stage After Injury. *American Journal of Sports Medicine* 2010;38:586-93 Online First: 2010/01/08]
- 8 Fischer F, Blank C, Dunnwald T, et al. Isokinetic Extension Strength Is Associated With Single-Leg Vertical Jump Height. *Orthop J Sports Med* 2017;5:2325967117736766 doi:10.1177/2325967117736766 [published Online First: 2017/11/18]
- 9 Hallagin C, Garrison JC, Creed K, et al. The Relationship between Pre-Operative and Twelve-Week Post-Operative Y-Balance and Quadriceps Strength in Athletes with an Anterior Cruciate Ligament Tear. *Int J Sports Phys Ther* 2017;12:986-93 Online First: 2017/11/22]
- 10 Harput G, Ozer H, Baltaci G, et al. Self-reported outcomes are associated with knee strength and functional symmetry in individuals who have undergone anterior cruciate ligament reconstruction with hamstring tendon autograft. *Knee* 2018;25:757-64 doi:10.1016/j.knee.2018.06.007 [published Online First: 2018/07/26]
- 11 Hohmann E, Bryant A and Tetsworth K. Strength does not influence knee function in the ACL-deficient knee but is a correlate of knee function in the and ACL-reconstructed knee. *Arch Orthop Trauma Surg* 2016;136:477-83 doi:10.1007/s00402-015-2392-6 [published Online First: 2016/01/01]
- 12 Hsieh CJ, Dominguez JA, Moser MW, et al. Gait Asymmetry after Meniscal Tear Is Associated with Knee Pain Intensity and Fear of Movement/Re-Injury. *Osteoarthritis and Cartilage* 2011;19:S90-S91 doi:10.1016/S1063-4584(11)60208-2 [published Online First: 2011/09]



- 13 Hsu CJ, George SZ and Chmielewski TL. Association of Quadriceps Strength and Psychosocial Factors With Single-Leg Hop Performance in Patients With Meniscectomy. *Orthop J Sports Med* 2016;4:2325967116676078 doi:10.1177/2325967116676078 [published Online First: 2017/02/18]
- 14 Hunnicutt JL, McLeod MM, Slone HS, et al. Quadriceps Neuromuscular and Physical Function After Anterior Cruciate Ligament Reconstruction. *J Athl Train* 2020;55:238-45 doi:10.4085/1062-6050-516-18 [published Online First: 2020/01/30]
- 15 Jamshidi AA, Olyaei GR, Heydarian K, et al. Isokinetic and functional parameters in patients following reconstruction of the anterior cruciate ligament. *Isokinetics and Exercise Science* 2005;13:267-72 doi:10.3233/Ies-2005-0213 [published Online First: 2005/12/09]
- 16 Keays SL, Bullock-Saxton JE, Newcombe P, et al. The relationship between knee strength and functional stability before and after anterior cruciate ligament reconstruction. *J Orthop Res* 2003;21:231-7 doi:10.1016/s0736-0266(02)00160-2 [published Online First: 2003/02/06]
- 17 Knezevic OM, Mirkov DM, Kadija M, et al. Alternating Consecutive Maximum Contraction as a Test of Muscle Function in Athletes Following ACL Reconstruction. *J Hum Kinet* 2012;35:5-13 doi:10.2478/v10078-012-0074-9 [published Online First: 2013/03/15]
- 18 Kong DH, Yang SJ, Ha JK, et al. Validation of functional performance tests after anterior cruciate ligament reconstruction. *Knee Surg Relat Res* 2012;24:40-5 doi:10.5792/ksrr.2012.24.1.40 [published Online First: 2012/05/10]
- 19 Lee DW, Yang SJ, Cho SI, et al. Single-leg vertical jump test as a functional test after anterior cruciate ligament reconstruction. *Knee* 2018;25:1016-26 doi:10.1016/j.knee.2018.07.014 [published Online First: 2018/08/18]
- 20 Menzer H, Slater LV, Diduch D, et al. The Utility of Objective Strength and Functional Performance to Predict Subjective Outcomes After Anterior Cruciate Ligament Reconstruction. *Orthop J Sports Med* 2017;5:2325967117744758 doi:10.1177/2325967117744758 [published Online First: 2018/01/11]
- 21 Myers H, Christopherson Z and Butler RJ. Relationship between the Lower Quarter Y-Balance Test Scores and Isokinetic Strength Testing in Patients Status Post ACL Reconstruction. *International Journal of Sports Physical Therapy* 2018;13:152-59 doi:10.26603/ijsp20180152
- 22 Nagai T, Schilaty ND, Laskowski ER, et al. Hop tests can result in higher limb symmetry index values than isokinetic strength and leg press tests in patients following ACL reconstruction. *Knee Surg Sports Traumatol Arthrosc* 2020;28:816-22 doi:10.1007/s00167-019-05513-3 [published Online First: 2019/04/27]
- 23 Pua YH, Ong PH, Ho JY, et al. Associations of isokinetic knee steadiness with hop performance in patients with ACL deficiency. *Knee Surg Sports Traumatol Arthrosc* 2015;23:2185-95 doi:10.1007/s00167-014-2995-4 [published Online First: 2014/04/24]
- 24 Ross MD, Irrgang JJ, Denegar CR, et al. The relationship between participation restrictions and selected clinical measures following anterior cruciate ligament reconstruction. *Knee Surg Sports Traumatol Arthrosc* 2002;10:10-9 doi:10.1007/s001670100238 [published Online First: 2002/01/31]
- 25 Tunay VB, Baltaci G, Ergun N, et al. Quadriceps femoris strength and knee functions in soccer players after anterior cruciate ligament reconstruction: six month follow-up. *Turkish Journal of Physiotherapy Rehabilitation* 2008;19:10-14
- 26 Kim JS, Hwang UJ, Choi MY, et al. Correlation Between Y-Balance Test and Balance, Functional Performance, and Outcome Measures in Patients Following ACL

- Reconstruction. *Int J Sports Phys Ther* 2022;17:193-200 doi:10.26603/001c.31873 [published Online First: 2022/02/10]
- 27 Clagg S, Paterno MV, Hewett TE, et al. Performance on the modified star excursion balance test at the time of return to sport following anterior cruciate ligament reconstruction. *J Orthop Sports Phys Ther* 2015;45:444-52 doi:10.2519/jospt.2015.5040 [published Online First: 2015/04/23]
- 28 Laudner K, Evans D, Wong R, et al. Relationship between Isokinetic Knee Strength and Jump Characteristics Following Anterior Cruciate Ligament Reconstruction. *International Journal of Sports Physical Therapy* 2015;10:272-80 Online First: 2015/06/01]
- 29 Sueyoshi T, Nakahata A, Emoto G, et al. Single-Leg Hop Test Performance and Isokinetic Knee Strength After Anterior Cruciate Ligament Reconstruction in Athletes. *Orthop J Sports Med* 2017;5:2325967117739811 doi:10.1177/2325967117739811 [published Online First: 2017/11/23]
- 30 Lepley AS, Pietrosimone B and Cormier ML. Quadriceps Function, Knee Pain, and Self-Reported Outcomes in Patients With Anterior Cruciate Ligament Reconstruction. *Journal of athletic training* 2018;53:337-46 doi:10.4085/1062-6050-245-16 [published Online First: 2018/04/18]
- 31 Chaput M, Palimenio M, Farmer B, et al. Quadriceps Strength Influences Patient Function More Than Single Leg Forward Hop During Late-Stage ACL Rehabilitation. *International Journal of Sports Physical Therapy* 2021;16:145-55 doi:10.26603/001c.18709 [published Online First: 2021/02/01]
- 32 Davis HC, Troy Blackburn J, Ryan ED, et al. Quadriceps rate of torque development and disability in individuals with anterior cruciate ligament reconstruction. *Clin Biomech (Bristol, Avon)* 2017;46:52-56 doi:10.1016/j.clinbiomech.2017.04.011 [published Online First: 2017/05/17]
- 33 Almeida GPL, Albano TR and Melo AKP. Hand-held dynamometer identifies asymmetries in torque of the quadriceps muscle after anterior cruciate ligament reconstruction. *Knee Surg Sports Traumatol Arthrosc* 2019;27:2494-501 doi:10.1007/s00167-018-5245-3 [published Online First: 2018/11/01]
- 34 Wongcharoenwatana J and Lertwanich P. Correlation of Hand-held Dynamometer and Isokinetic Dynamometer for Determining Quadriceps Index in Post-operative Anterior Cruciate Ligament Reconstruction. *Journal of the Medical Association of Thailand* 2019;102:57-61
- 35 Machado I, Alvarez D, Motta LM, et al. Correlation among Knee Muscle Strength and Self-Reported Outcomes Score, Anterior Tibial Displacement, and Time Post-Injury in Non-Coper Anterior Cruciate Ligament Deficient Patients: A Cross-Sectional Study. *Int J Environ Res Public Health* 2021;18 doi:10.3390/ijerph182413303 [published Online First: 2021/12/25]
- 36 Pua YH, Ho JY, Chan SA, et al. Associations of isokinetic and isotonic knee strength with knee function and activity level after anterior cruciate ligament reconstruction: a prospective cohort study. *Knee* 2017;24:1067-74 doi:10.1016/j.knee.2017.06.014 [published Online First: 2017/07/26]
